# Supplementary material for: FUME 2.0 – Flexible Universal processor for Modeling Emissions
Source: Copernicus journal article supplement (doi:10.5194/gmd-17-3867-2024), 2024-05-15
Supplement: Supplementary file 1 [file gmd-17-3867-2024-supplement.zip]

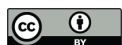

*Supplement of*

## **FUME 2.0 – Flexible Universal processor for Modeling Emissions**

**Michal Belda et al.**

*Correspondence to:* Michal Belda ([michal.belda@matfyz.cuni.cz](mailto:michal.belda@matfyz.cuni.cz))

- [gmd-17-3867-2024-supplement-title-page.pdf](#)
- [report\\_SUM\\_1694526525426.txt](#)

The copyright of individual parts of the supplement might differ from the article licence.
